# Supplementary material
Source: PubMed Central journal article supplement (PMC6989952)
Supplement: BPH-177-254-s001.pdf [file BPH-177-254-s001.pdf]

## Supporting information

**Table 1 Respiratory parameter values before and after opioid antagonist administration**

| Drug                                  | Pre drug-treatment baseline |                                      | Post drug-treatment baseline |                                      | n |
|---------------------------------------|-----------------------------|--------------------------------------|------------------------------|--------------------------------------|---|
|                                       | Respiratory rate (bpm)      | Tidal volume (ml.min <sup>-1</sup> ) | Respiratory rate (bpm)       | Tidal volume (ml.min <sup>-1</sup> ) |   |
| Naltrindole<br>10 mg.kg <sup>-1</sup> | 430.5 ± 14.7                | 0.37 ± 0.03                          | 434.8 ± 8.2                  | 0.38 ± 0.03                          | 6 |
| Nor BNI<br>20 mg.kg <sup>-1</sup>     | 370.3 ± 22.5                | 0.36 ± 0.03                          | 397.0 ± 24.1                 | 0.35 ± 0.03                          | 6 |

All values are mean ± SEM of 5-min averages; bpm, breaths per minute. Pre-treatment baseline was taken as the final 5-min of respiration before administration of Naltrindole (30-min pre-treatment) or Nor BNI (24-hr pre-treatment). Post-treatment baseline was taken as the final 5-min of respiration before administration of fentanyl. Naltrindole and Nor BNI did not significantly alter respiratory parameters alone. Values were compared using a paired two-way Student's t-test.

**Table 2. Baseline respiratory parameters in  $\mu$ -opioid receptor knock-out and wild type mice.**

| Wild type mouse baseline |                                      | $\mu$ Knock-out mouse baseline |                                      | n |
|--------------------------|--------------------------------------|--------------------------------|--------------------------------------|---|
| Respiratory Rate (bpm)   | Tidal volume (ml.min <sup>-1</sup> ) | Respiratory Rate (bpm)         | Tidal Volume (ml.min <sup>-1</sup> ) |   |
| 454 ± 10.9               | 0.33 ± 0.01                          | 438 ± 13.6                     | 0.33 ± 0.03                          | 6 |

All values are mean ± SEM of 5-min averages; bpm, breaths per minute. Baseline measurements were taken from the 15-20 min baseline period prior to fentanyl administration. There was no significant difference in respiratory parameters between wild type and  $\mu$  knock-out mice. Values were compared using an unpaired two-way Student's t-test.
